# Supplementary material for: A first principles study of H2S adsorption and decomposition on a Ge(100) surface
Source: Royal Society of Chemistry journal article supplement (doi:10.1039/c4ra08887e), 2014-12-06
Supplement: c4ra08887e1.pdf [file c4ra08887e1.pdf]

# A First principle study of H<sub>2</sub>S adsorption and decomposition on Ge (100) surface

*Tsung-Fan Teng<sup>†,‡</sup>, Santhanamoorthi Nachimuthu<sup>†</sup>, Wei-Hsiu Hung<sup>‡</sup>, Jyh-Chiang  
Jiang<sup>†\*</sup>*

<sup>†</sup> Department of Chemical Engineering, National Taiwan University of Science and  
Technology, Taipei 106, Taiwan

<sup>‡</sup> Department of Chemistry, National Taiwan Normal University, Taipei 116,  
Taiwan

**Table S1.** Calculated lattice constant of bulk Ge with different pseudo- potentials.

| <b>Parameters</b>          | <b>Pseudo- potentials</b> |                |               |
|----------------------------|---------------------------|----------------|---------------|
|                            | <b>PAW-GGA</b>            | <b>PAW-PBE</b> | <b>US-GGA</b> |
| lattice constant (Å)       | 5.79                      | 5.76           | 5.77          |
| deviation (%) <sup>a</sup> | 2.33                      | 1.9            | 2.0           |

<sup>a</sup> The definition of deviation is  $\frac{|\text{calculated value} - \text{experimental value}|}{\text{experimental value}} \times 100\%$ , in which the experimental value is 5.43 Å.

**Table S2.** The total energy (E in eV) and barriers for the respective transition states ( $E_b$  in eV) for the adsorption of  $H_2S$  on a clean Ge(100) surface calculated at different functionals and different cutoff energy values. .

| System             | US(300 eV) |       | US(450 eV) |       | PBE(300eV) |        |
|--------------------|------------|-------|------------|-------|------------|--------|
|                    | E          | $E_b$ | E          | $E_b$ | E          | $E_b$  |
| $H_2S_{ad}$        | -351.3594  |       | -351.3914  |       | -306.4971  |        |
| LM1 <sub>III</sub> | -351.9863  |       | -351.8528  |       | -306.7356  |        |
| TS1 <sub>III</sub> | -351.3099  | 0.050 | -351.2892  | 0.102 | -306.3369  | 0.1602 |
| LM1 <sub>II</sub>  | -351.7965  |       | -351.9285  |       | -306.7278  |        |
| TS1 <sub>II</sub>  | -350.9179  | 0.441 | -350.9026  | 0.488 | -305.9288  | 0.5683 |
| LM1 <sub>I</sub>   | -351.9425  |       | -351.7829  |       | -306.6394  |        |
| TS1 <sub>I</sub>   | -350.8532  | 0.506 | -350.8605  | 0.530 | -305.7885  | 0.7086 |

**Table S3.** Calculated dimer bond length ( $d_D$ ) and dimer tilting angle ( $\theta$ ) for a clean Ge(100) surface, compared with results from other calculations and experimental data.

|             | <b>method</b>       | <b><math>d_D</math> (Å)</b> | <b><math>\theta</math> (deg)</b> |
|-------------|---------------------|-----------------------------|----------------------------------|
| Ge(100)-4x2 | US-this work        | 2.54                        | 20.7                             |
|             | LDA <sup>34</sup>   | 2.41                        | 19.0                             |
|             | X-ray <sup>35</sup> | 2.44                        | 21.0                             |
|             | STM <sup>36</sup>   | 2.51                        | 19.7                             |

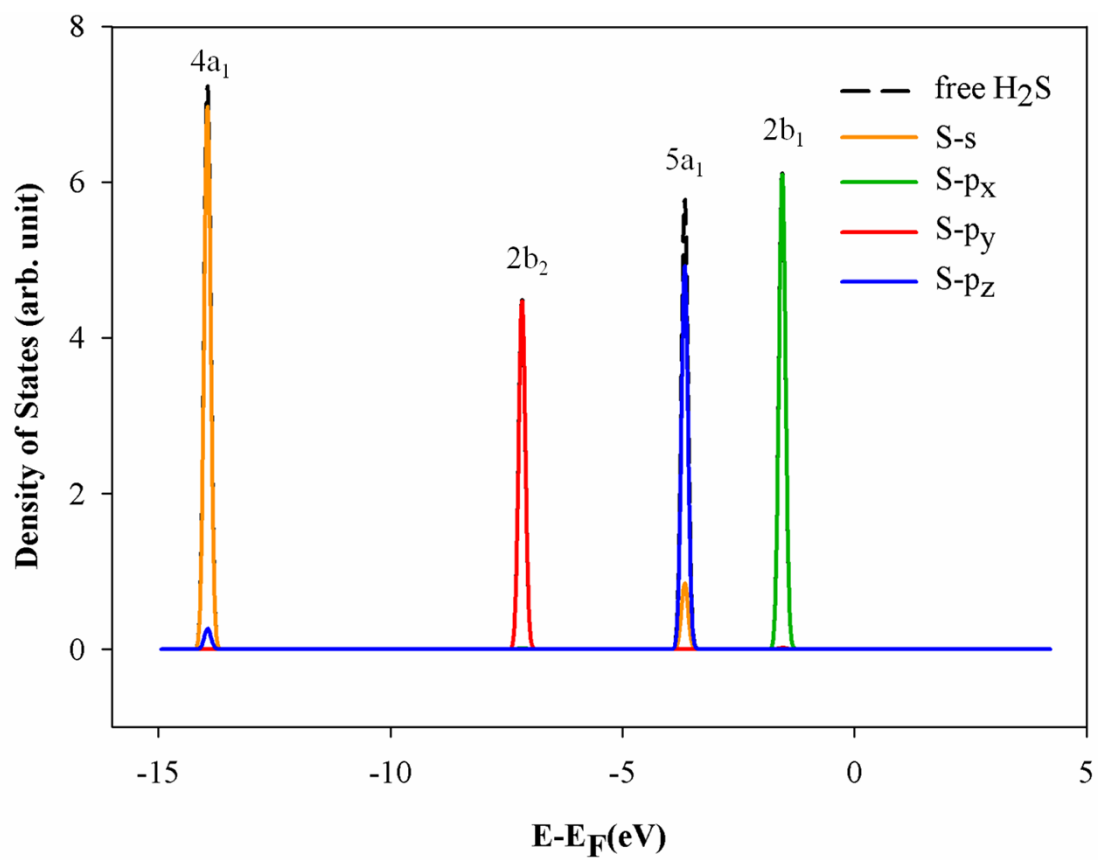

Figure S1. PDOS of gaseous H<sub>2</sub>S.

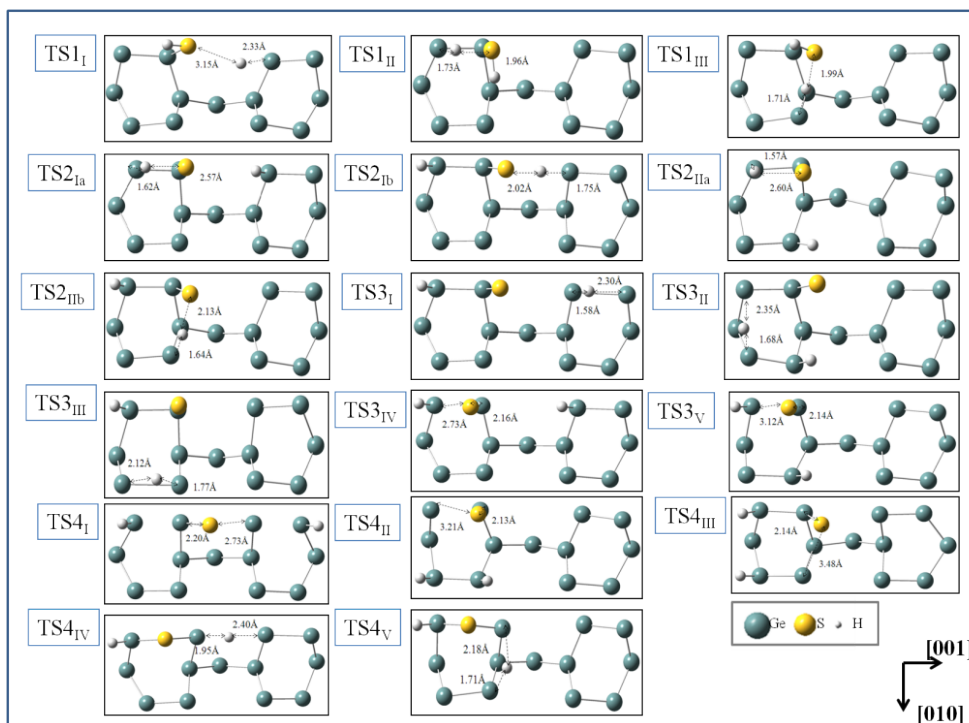

**Figure S2.** Top view of all transition states of the reactions for H<sub>2</sub>S on Ge(100) surface. (a) TS1<sub>I</sub>, (b) TS1<sub>II</sub>, (c) TS1<sub>III</sub>, (d) TS2<sub>I-a</sub>, (e) TS2<sub>I-b</sub>, (f) TS2<sub>II-a</sub>, (g) TS2<sub>II-b</sub>, (h) TS3<sub>I</sub>, (i) TS3<sub>II</sub>, (j) TS3<sub>III</sub>, (k) TS3<sub>IV</sub>, (l) TS3<sub>V</sub>, (m) TS4<sub>I</sub>, (n) TS4<sub>II</sub>, (o) TS4<sub>III</sub>, (p) TS4<sub>IV</sub>, (q) TS4<sub>V</sub>.
